# Supplementary material for: The Epigenetic Regulator G9a Mediates Tolerance to RNA Virus Infection in Drosophila
Source: PLoS Pathog. 2015 Apr 16;11(4):e1004692. doi: 10.1371/journal.ppat.1004692 (PMC4399909; doi:10.1371/journal.ppat.1004692)
Supplement: S4 Dataset — (XLSX) [file ppat.1004692.s011.xlsx]

## Sheet: Fig5A
Ct	G9a+/+ Mock	G9a+/+ Mock	G9a+/+ Mock	G9a+/+ DCV	G9a+/+ DCV	G9a+/+ DCV		Ct	G9a+/+ Mock	G9a+/+ Mock	G9a+/+ Mock	G9a+/+ DCV	G9a+/+ DCV	G9a+/+ DCV
rp49	19.53	21.99	20.17	25.65	24.69	24.8		rp49	17.53	16.77	16.12	22.21	20.59	21.61
Domeless	33.68	33.81	33.6	39.79	39.56	39.52		Socs	32.62	33.21	31.63	36.83	33.46	32.73
dPIAS	26.19	27.12	25.76	32.2	31.07	30.29
Ct	G9a-/- Mock	G9a-/- Mock	G9a-/- Mock	G9a-/- DCV	G9a-/- DCV	G9a-/- DCV		Ct	G9a-/- Mock	G9a-/- Mock	G9a-/- Mock	G9a-/- DCV	G9a-/- DCV	G9a-/- DCV
rp49	24.93	23.52	25.48	27.56	26.26	25.21		rp49	27.54	21.45	21.05	24.63	20.65	21.21
Domeless	36.61	35.6	35.81	37.14	36.23	36.18		Socs	35.71	34.03	34.15	35.01	32.76	33.98
dPIAS	30.37	28.14	30.64	31.61	30.51	29.48

## Sheet: Fig5B
Fat Body	G9a+/+	G9a+/+	G9a+/+	G9a-/-	G9a-/-	G9a-/-
rp49	20.04	19.57	20.55	20.62	19.02	19.32
Soc36E	32.8	32.61	33.69	33.96	31.9	32.2
Fat Body	G9a+/+	G9a+/+	G9a+/+	G9a-/-	G9a-/-	G9a-/-
rp49	21.03	20.32	21.46	21.55	19.69	20.12
Domeless	31.64	29.78	30.69	31.7	29.32	28.6
dPIAS	26.14	23.63	26.04	25.1	25.64	25.33

## Sheet: Fig5D
	G9a+/+ and G9a-/- Fat Body - Steady State - 3 to 5 days
	G9a+/+ input			G9a+/+ H3K9me2
Moca	30.68	30.56	30.61	31.91	32.22	31.66
Socs	29.82	29.38	29.5	28.44	28.99	27.99
Dome	29.1	29.17	29.25	28.19	28.3	27.55
TotM	31.41	31.27	31.02	31.78	31.69	30.64
dPIAS	29.48	29.29	29.58	29.54	29.6	29.33
	G9a-/- input			G9a-/- H3K9me2
Moca	31.01	31.17	31.66	31.65	31.96	32.41
Socs	28.91	29.45	29.09	28.81	28.69	28.86
Dome	29.48	30.07	30.63	29.87	29.72	29.95
TotM	29.22	29.09	29.68	29.16	29.24	29
dPIAS	30.12	30.57	30.84	29.6	29.71	29.94
	G9a+/+ and G9a-/- Fat Body - Steady State - 3 to 5 days
	G9a+/+ input			G9a+/+ H3K9me2
Moca	24.99	25.52	25.92	25.76	27.32	26.38
Vir-1	24.28	24.52	24.4	25.55	26.14	24.77
	G9a-/- input			G9a-/- H3K9me2
Moca	26.56	26.29	27.16	27.47	26.9	26.5
Vir-1	24.94	24.73	26.31	25.8	25.52	25.39
